1 **Title: Branch angle responses to photosynthesis are partially dependent on *TILLER***  
2 ***ANGLE CONTROL 1***

3

4 **Running Title: TAC1 expression is controlled by photosynthetic signals**

5

6 **Authors:**

7 Jessica M. Guseman<sup>1</sup>, [Jessica.Guseman@ars.usda.gov](mailto:Jessica.Guseman@ars.usda.gov)

8 Christopher Dardick<sup>1</sup>, [Chris.Dardick@ars.usda.gov](mailto:Chris.Dardick@ars.usda.gov)

9

10 **Affiliations:**

11 <sup>1</sup> United States Department of Agriculture (USDA) Appalachian Fruit Research Station, 2217  
12 Wiltshire Road, Kearneysville, WV, U.S.A.

13

14 **Correspondence:**

15 Christopher Dardick

16 Phone: (304)-725-3451 ext. 387 Fax: (304)-728-2340

17 E-mail: [Chris.Dardick@ars.usda.gov](mailto:Chris.Dardick@ars.usda.gov)

18

19 Date of submission: 19 January 2018

20 Number of tables: 0

21 Number of figures: 4

22 Word count: 3350

23

24 **HIGHLIGHT**

25

26 Branch angles narrow in darkness or under far-red light. This response is partially mediated by  
27 *TAC1* which responds to photosynthetic signals, providing a key link between photosynthesis  
28 and plant architecture.

29

30 **ABSTRACT**

31

32 Light serves as an important environmental cue in regulating plant architecture. Previous work  
33 had demonstrated that both photoreceptor-mediated signaling and photosynthesis play a role in  
34 determining the orientation of plant organs. *TILLER ANGLE CONTROL 1 (TAC1)* was recently  
35 shown to function in setting the orientation of lateral branches in diverse plant species, but the  
36 degree to which it plays a role in light-mediated phenotypes is unknown. Here, we demonstrated  
37 that *TAC1* expression was light dependent, as expression was lost under dark or far-red growth  
38 conditions, but did not display any clear diurnal rhythm. Loss of *TAC1* in the dark was gradual,  
39 and experiments with photoreceptor mutants indicated this was not dependent upon Red/Far-Red  
40 or Blue light signaling, but partially required the signaling integrator *CONSTITUTIVE*  
41 *PHOTOMORPHOGENESIS 1 (COP1)*. Over-expression of *TAC1* partially prevented the  
42 narrowing of branch angles in the dark or under Far-Red light. Treatment with the carotenoid  
43 biosynthesis inhibitor Norflurazon or the PSII inhibitor DCMU led to loss of *TAC1* expression  
44 similar to dark or far-red conditions, but surprisingly expression increased in response to the PSI  
45 inhibitor Paraquat. Our results indicate that *TAC1* plays an important role in modulating plant  
46 architecture in response to photosynthetic signals.

47

48 **KEYWORDS**

49

50 Branch orientation, gravitropic set point angle, plant architecture, IGT gene family, Arabidopsis,  
51 photosynthesis inhibitors, LAZY1

## 52 INTRODUCTION

53

54 Plant architecture is intimately connected to light. It both influences the ability of the plant to  
55 intercept light and adjusts in response to light conditions. Architectural parameters such as organ  
56 angles, organ numbers, and branch lengths influence the quantity of light a plant can capture. For  
57 example, increased leaf number increases photosynthetic surface area, larger plant size and  
58 longer branches can allow plants to avoid shade from their neighbors, and leaf angle changes  
59 with respect to the angle of sunlight influence the amount of light captured (Osada and Hiura,  
60 2017). In turn, changes in light quality and quantity result in the modification of these  
61 parameters. Growing plants under shaded conditions, for example, results in phenotypes  
62 characteristic of shade avoidance syndrome, including upward leaf movement, accelerated  
63 elongation of plant organs, and fewer shoot branches (Casal, 2012). In addition to these, shade  
64 also leads to more vertically oriented branches in *Arabidopsis* (Roychoudhry *et al.*, 2017).

65

66 Lateral organ orientation, or angle, is an important aspect of plant architecture that has been  
67 connected to multiple light signaling pathways. Recent work addressing neighbor detection  
68 demonstrated that petiole angle altered in response to FR light detection at the leaf margin  
69 (Pantazopoulou *et al.*, 2017). These studies showed a connection between R/FR light signaling  
70 and architecture. Early work defining gravitropic set point angle, the angle at which organs grow  
71 with respect to gravity, identified a regulatory role for photosynthesis using *Tradescantia* as a  
72 model (Digby and Firn, 2002). However, beyond this study little work has been done to elucidate  
73 the connection between photosynthesis and branch angles.

74

75 Studies to determine the endogenous genetic components underlying lateral organ orientation  
76 identified loci associated with narrowed angles in Rice, Maize, and Brassica (Yu *et al.*, 2007; Ku  
77 *et al.*, 2011; Li *et al.*, 2017). A gene repeatedly identified in these studies, *TILLER ANGLE*  
78 *CONTROL 1 (TAC1)*, has been shown to regulate lateral branch angle in *Arabidopsis*, peach, and  
79 plum (Dardick *et al.*, 2013; Hollender *et al.*, in press). Loss of *TAC1* expression, through  
80 mutation or silencing, results in more vertical organ orientation in tillers, branches, leaves, and  
81 pedicels. In peach canopies this led to increased rate of carbon accumulation, as the changes in  
82 canopy shape allowed increased light penetrance (Glenn *et al.*, 2015). *TAC1* belongs to the IGT

83 family, named for a shared amino acid motif, which also contain *LAZY* and *DEEPER ROOTING*  
84 (*DRO*) genes (Hollender and Dardick, 2015). Members of the *LAZY* and *DRO* clades have  
85 recently been reported to influence both shoot and root organ orientation via changes in gravity  
86 response upstream of auxin transport (Yoshihara *et al.*, 2013; Ge and Chen, 2016; Guseman *et*  
87 *al.*, 2016; Taniguchi *et al.*, 2017; Yoshihara and Spalding, 2017). Currently, little is known about  
88 the regulation of IGT genes, however *LAZY1* expression in maize was reported to be lower under  
89 light conditions (Dong *et al.*, 2013).

90  
91 Here we address the hypothesis that *TAC1* is involved in light regulation of lateral branch angles.  
92 Our results show that *TAC1* exhibits light dependent gene expression, which correlates with  
93 narrowed branch angles in response to prolonged growth in darkness. Constitutive expression of  
94 *TAC1* could partially, but not fully rescue changes in lateral branch orientation. *TAC1* expression  
95 was not dependent upon known photoreceptor signaling pathways, but partially required a fully  
96 functional *CONSTITUTIVE PHOTOMORPHOGENESIS 1 (COP1)* gene. Using various  
97 photosynthetic inhibitors, we found that *TAC1* expression was abolished when treated with  
98 Norflurazon (NF) and 3-(3,4-Dichlorophenyl)-1,1-dimethylurea (DCMU) and increased in  
99 response to Paraquat (PQ) treatment, suggesting that *TAC1* is a target of photosynthetic signals  
100 to alter the angle of organs in response to persistent changes in light exposure.

101

## 102 **MATERIALS AND METHODS**

103

### 104 **Plant material and growth conditions**

105 The Columbia (Col-0) and Landsberg erecta (Ler) ecotypes were used as WT lines in all  
106 experiments. Signaling mutants *phyAB* and *phyABDE* (Hu *et al.*, 2013), *cry1;cry2* (Mockler *et*  
107 *al.*, 1999), *phot1;phot2* (Kinoshita *et al.*, 2001), *cop1-6* (Ang and Deng, 1994), *pifQ* (Lilley *et*  
108 *al.*, 2012) and *hy5;hfr1;laf1* (Jang *et al.*, 2013) were previously described. For phenotyping and  
109 expression studies, seeds were surface sterilized and sown on square plates containing half-  
110 strength MS and 0.8% bactoagar and grown vertically. Once sown, seedlings were stratified at  
111 4°C in the dark for 2 days, then placed in growth chambers at 20°C with a 16-h light/8-h dark  
112 photoperiod (~100  $\mu\text{mol m}^{-2} \text{sec}^{-1}$ ).

113

## 114 **Branch angle measurements**

115 For shoot branch angles, seedlings were grown for 2 weeks on plates, then transplanted into 4-  
116 inch pots containing Metromix 360 soil (Sun-Gro Horticulture, <http://www.sunagro.com>) and  
117 grown until bolting (~6–7 inches in height). Plants were then transferred to continuous light or  
118 dark conditions for 72 hours. Bolts were then photographed and pressed. Images were taken  
119 using a Canon EOS Rebel T3 camera (<http://global.canon/en/index.html>). Angles were manually  
120 calculated by measuring the angle of the tangent of each lateral branch point, with respect to the  
121 upper main stem.

122

## 123 **RNA extraction and quantitative real time PCR**

124 Arabidopsis seedlings were grown on vertical plates for 10-14 days. Four biological replicates  
125 were used. Each biological replicate consisted of a plate of 10-12 seedlings. Arabidopsis RNA  
126 was extracted using a Directzol RNA Extraction Kit (Zymo Research,  
127 <http://www.zymoresearch.com>). qPCR was performed as previously described by Dardick et al.  
128 (2010). Briefly, each reaction was run in triplicate using 50 ng of RNA in a 12 $\mu$ l reaction  
129 volume, using the Superscript III Platinum SYBR Green qRT-PCR Kit (Invitrogen, now  
130 ThermoFisher Scientific, <https://www.thermofisher.com>). The reactions were performed using a  
131 7900 DNA sequence detector (Applied Biosystems, now ThermoFisher Scientific,  
132 <https://www.thermofisher.com>). Quantification for Arabidopsis samples was performed using a  
133 relative curve derived from a serially diluted standard RNA run in parallel. *UBC21* was used as  
134 an internal control to normalize expression in light experiments, and *IPP2* was used for circadian  
135 experiments.

136

## 137 **Light and time-course experiments**

138 For light experiments, plants were grown for 10 days on vertical plates in 16:8 long day light  
139 conditions in a growth chamber before transfer to experimental light conditions. For comparisons  
140 between light and dark, plates were moved to chambers with either continuous light or  
141 continuous dark conditions for 72 hours, then whole seedlings were collected and flash frozen at  
142 10am (ZT4). For comparisons between light colors, plates were moved to chambers with  
143 continuous white, red, blue, or far red light for 72 hours and whole seedlings were collected at  
144 10am (ZT4). Matching growth chambers fitted with white, red, blue, and far-red LED lamps

145 from PARsource (<http://parsource.com>) were used for light color experiments. For circadian  
146 experiments, seedlings were grown for 10 days in 12L:12D light cycles, then transferred to  
147 continuous light and collected every 4 hours for 84 hours. For adult phenotypes, plants were  
148 grown on soil for 5-6 weeks, until bolts reached 4-6 inches in height. Then plants were  
149 transferred to continuous W or FR light conditions for 72 hours then imaged and collected.

150

### 151 **Chemical treatments**

152 For sucrose experiments, plants were germinated and grown on 0.5x MS plates for 10 days, then  
153 transplanted to plates containing 1% sucrose. Plates were then moved to continuous light or dark  
154 conditions for 72 hours and collected at 10am (ZT4). For photosynthesis experiments, plants  
155 were grown on vertical MS plates for 7 days, then transplanted onto media containing either  
156 Norflurazon (5uM), DCMU (10uM), Paraquat (1uM), or mock (water). Plates were then moved  
157 to continuous light or dark conditions for 5 days and collected at 10am (ZT4). For treatment of  
158 adult plants, Arabidopsis were grown for 5-6 weeks until bolts reached 4-6 inches in height.

159

### 160 **Chlorophyll Fluorescence Imaging**

161 All chlorophyll fluorescence was measured using the Maxi-Imaging-PAM Chlorophyll  
162 Fluorometer (Walz, Effeltrich, Germany). Maximum PSII quantum yield ( $F_v'/F_m'$ ) was  
163 determined using an actinic light pulse ( $1500 \mu\text{mol m}^{-2} \text{s}^{-1}$ ). Average  $F_v'/F_m'$  values were  
164 calculated for a similar area of interest for 6 seedlings on each chemical treatment, using the  
165 Maxi-Imaging-PAM software.

166

## 167 **RESULTS**

168

### 169 ***TAC1* expression is lost under extended continuous dark conditions**

170

171 To address whether *TAC1* plays a role in light regulation of organ angle, we initially screened the  
172 promoter region upstream of *TAC1* for the occurrence of light-related cis-elements (Fig 1A).  
173 Using a cis-element database (AGRIS AtcisDB, <http://arabidopsis.med.ohio-state.edu/AtcisDB/>),  
174 we identified several elements, including GATA motifs, a G-box, T-boxes, and AtMYC2  
175 binding sites. Next, we tested the response of *TAC1* expression to plant growth in continuous

176 dark for 72 hours. *TAC1* expression was lost while that of a control gene, *UBC21*, was  
177 unaffected (Fig 1B). To determine the dynamics of this expression loss, we performed a time  
178 course experiment over a 72 hour period of continuous dark. Expression levels gradually  
179 declined over time, reaching their lowest values by 48 hours (Fig 1C). Plants grown for 72 hours  
180 in continuous dark and then returned to continuous light showed similar expression dynamics.  
181 Expression began to increase around 4 hours once transferred back into the light, but did not  
182 return to normal levels until 48 hours (Fig 1D). To address whether *TAC1* exhibits a diurnal  
183 rhythm, we performed a circadian time course, transferring plants previously entrained to a  
184 12L:12D light cycle to continuous light conditions. *TAC1* expression did not exhibit a clear  
185 rhythm (Fig 1E). Taken together, the data suggest *TAC1* expression is dependent on light, but  
186 with gradual response dynamics.

187

#### 188 **Lateral branch angles narrow in response to growth in 72h of continuous dark.**

189

190 To test whether the loss of *TAC1* expression in dark conditions correlated with changes in  
191 Arabidopsis branch angle phenotypes, we grew adult plants in continuous dark for 72 hours.  
192 Lateral branch angles of wild-type plants significantly narrowed by about 10 degrees compared  
193 to continuous light-grown controls (Fig 2). Plants overexpressing *TAC1* (*35S::TAC1*) still  
194 showed narrowed branch angles in dark conditions but not to the same degree as Col, suggesting  
195 there are *TAC1*-dependent and *TAC1*-independent pathways influencing this process. *tac1*  
196 mutants plants exhibited narrow angles, similar to dark-grown wild-type plants, in both light and  
197 dark conditions.

198

#### 199 ***TAC1* is lost in FR light, does not require *phys*, *crys*, or *phots*, but is reduced in a weak *cop1* 200 mutant background**

201

202 We next sought to determine which aspects of light were required for *TAC1* expression. First, we  
203 tested the requirement for specific light wavelengths, growing plants in 72 hours of continuous  
204 white (W), red (R), blue (B), or far-red (FR) light (Fig 3B). In comparison to growth in W light,  
205 *TAC1* expression was not significantly different under R, and elevated slightly, about two-fold,  
206 under B light. Under FR light, the response was similar to growth in darkness, with very low



207 levels of expression. We tested whether FR treatment reduced expression in adult plants and led  
208 to similar changes in branch angles observed in dark-grown plants. Adult wild-type and  
209 *35S::TAC1* plants were grown in continuous W and FR light for 72 hours, then plants were  
210 imaged, lateral apices were collected, and angles at branch points were measured. Compared to  
211 W light, FR-grown plants showed loss of *TAC1* expression, similar to dark conditions, and  
212 branch angles narrowed by about 8 degrees (Fig 3 C-D). Contrary to this, plants containing a  
213 *35S::TAC1* construct did not show a reduction in *TAC1* expression in FR light. Branch angles  
214 narrowed slightly but not to the same degree as Col plants in response to FR light. These results  
215 were consistent with dark experiments and confirms there are likely both *TAC1*-dependent and  
216 independent mechanisms for regulating branch angles in response to changes in light.

217  
218 The findings prompted us to explore two potential mechanisms by which *TAC1* expression could  
219 be regulated by light: first, that *TAC1* expression requires either R or B light via photoreceptor  
220 signaling, or second, that *TAC1* expression is controlled by another light-related process such as  
221 photosynthesis. To test the first, we looked at *TAC1* levels in different photoreceptor and light-  
222 signaling mutant backgrounds, grown under W, R, or B light. While there were small, but  
223 significant changes in expression in some photoreceptor mutant backgrounds (Figs 3E and F),  
224 none of these changes could explain the loss of *TAC1* observed in the dark. For example, if  
225 phytochromes were required for *TAC1* expression, then loss of *TAC1* would be expected in a *phy*  
226 mutant background grown under R light. There was a relatively small decrease in *TAC1*  
227 expression in the *phyAB* mutant in R light, however this does not mimic dark-growth results, and  
228 the quadruple *phyABDE* mutant did not show a similar effect (Fig 3E). Similarly, there was a  
229 small but significant loss of *TAC1* expression in the *phot1;phot2* background as compared to Col  
230 WT in B, however not enough to explain loss of gene expression in the dark (Fig 3F). In  
231 addition, we used several mutants downstream of both R/FR and B light signaling pathways: a  
232 weak *cop1* allele, a triple *hy5;hfr1;laf1* mutant and the *pif1;pif3;pif4;pif5* (*pifQ*) mutant (Figs 3G  
233 and H). Similar to the photoreceptor mutants, we saw relatively minor or insignificant changes in  
234 *TAC1* levels in *pifQ* and *hy5;hfr1;laf1* mutant backgrounds. To the contrary, we saw a larger and  
235 significant reduction in expression in *cop1-6* mutants. Together, the data suggest that different  
236 aspects of R/FR and B light signaling may influence *TAC1* expression to a small degree, but do  
237 not explain the loss of expression in dark-grown plants.



238

239 **Exogenous sucrose does not rescue loss of *TAC1* in the dark**

240

241 Sucrose has been reported to have an effect on lateral organ angle (Willemoes *et al.*, 1988), and  
242 dark-grown plants have decreased photosynthetic efficiency, and thus produce less  
243 photosynthate. To test whether *TAC1* expression is dependent on the products of photosynthesis,  
244 we grew plants on media supplemented with sucrose and exposed these to continuous light and  
245 dark conditions (Fig 4A). Gene expression was similar when supplemented with sucrose in both  
246 conditions, demonstrating that exogenous sucrose was not sufficient to attenuate the loss of  
247 *TAC1* expression in the dark. This suggests that sucrose-mediated alteration of organ angle is  
248 *TAC1*-independent.

249

250 **Photosynthetic inhibitors have differential effects on *TAC1* expression**

251

252 To test if *TAC1* expression is regulated by photosynthetic activity, we treated plants with a series  
253 of photosynthesis inhibitors. Each of these inhibitory chemicals impairs photosynthesis through  
254 different pathways. Treatment with norflurazon (NF) inhibits carotenoid biosynthesis, allowing  
255 for the formation of triplet chlorophyll and subsequent photooxidating damage within the  
256 chloroplast (Gray *et al.*, 2003). DCMU specifically inhibits electron transport by blocking the  
257 plastoquinone binding site of Photosystem II. In contrast, Paraquat (PQ), also known as methyl  
258 viologen, acts by shunting electrons from Photosystem I, and producing high levels of reactive  
259 oxygen species (ROS). 7 day-old seedlings transferred to media supplemented with these  
260 photosynthetic inhibitors were grown in continuous light or dark and measured for  
261 photosynthetic efficiency (Fv/Fm) and *TAC1* gene expression (Fig 4B-D). Treatment with NF  
262 led to decreased photosynthetic efficiency, as measured by chlorophyll fluorescence imaging,  
263 and abolished *TAC1* expression in the light, mimicking the effect observed in dark-grown plants  
264 (Fig 4B-D). DCMU treatment resulted in near total loss of chlorophyll fluorescence, and treated  
265 plants showed a similar decrease in *TAC1* expression as with NF treatment. PQ treatment  
266 displayed an inconsistent reduction in PSII efficiency, but led to variable but significant  
267 increases in *TAC1* expression (Fig 4B-D). All plants grown under continuous dark conditions  
268 exhibited loss of *TAC1*, regardless of treatment (Fig 4B).

269

## 270 **DISCUSSION**

271

272 Lateral organ angle is strongly tied to light capture, which has important implications for plant  
273 productivity and competition. Previously, a connection between photosynthesis and branch angle  
274 was described in *Tradescantia* by Digby and Firn (2002). We provide evidence that *TAC1* is a  
275 target of photosynthetic signals, and is partially required for the changes in lateral branch angles  
276 that are driven by photosynthesis. Arabidopsis grown in continuous darkness exhibited more  
277 vertically oriented lateral branches, phenocopying a *tac1* mutant phenotype. *TAC1* expression in  
278 dark-grown plants was abolished after 24-48h, suggesting that this mechanism is in place to  
279 induce vertical growth when branches are subjected to extended periods of darkness. Consistent  
280 with this, *Tradescantia* plants treated with the photosynthetic inhibitor DCMU grew upward,  
281 mimicking their growth in dark conditions (Digby and Firn, 2002). Treatment with NF results in  
282 triplet chlorophyll formation, and also decreases nuclear gene expression involved in multiple  
283 photosynthetic processes, including the light harvest complex, electron transfer chain,  
284 photosystem II oxygen-evolving complex, and the reductive pentose phosphate pathway, (Gray  
285 *et al.*, 2003), effectively reducing function of multiple early steps in photosynthesis. The loss of  
286 *TAC1* expression in response to NF treatment may suggest that photosystem II function is  
287 required. PQ effectively reduces photosystem I function, later in photosynthesis, and also  
288 generates ROS production. The increase of expression in response to PQ suggests that *TAC1*  
289 does not require photosystem I, and may be sensitive to ROS signaling. Taken together, it is  
290 likely that *TAC1* functions downstream of photosynthesis as a regulator of branch angle.

291

292 Both sucrose treatment and photoreceptor-mediated light signaling play roles in setting lateral  
293 organ angles (Willemoes *et al.*, 1988; Pantazopoulou *et al.*, 2017; Roychoudhry *et al.*, 2017).  
294 However, neither had a strong influence on *TAC1* expression. Growth in FR light both decreased  
295 *TAC1* expression and led to narrowed branch angles, but *TAC1* remained relatively unaffected by  
296 R/FR signaling components. Recent work demonstrated that *PIF4* is not required for shade-  
297 induced reduction in lateral branch angle (Roychoudhry *et al.*, 2017). Our finding that *TAC1*  
298 expression is unchanged in a *pifQ* mutant background is consistent with this finding. Blue light  
299 led to elevated levels of *TAC1* in several experiments. However, large increases in expression, in

300 the case of 35S::TAC1 plants, had little effect on increasing branch angle. Together, these data  
301 suggests that the influence of both sucrose, and B and R/FR light signaling on organ orientation  
302 is largely *TAC1*-independent.

303  
304 Of the light signaling mutants tested, *cop1-6* mutants had the strongest effect on *TAC1* gene  
305 expression. However, the effect of *COPI* appears to be independent of phytochrome or  
306 cytochrome-mediated signaling, as other mutants within these pathways exhibited little to no  
307 change. Recent work has implicated *COPI* in chloroplast retrograde signaling, revealing that  
308 *COPI* degrades *ABI4* in the light during de-etiolation (Xu *et al.*, 2016). The requirement of  
309 *COPI* coupled with the differential responses of *TAC1* expression to chemical inhibitors of  
310 photosynthesis raises the question whether *TAC1* is regulated by retrograde signaling. The data  
311 presented here suggests a possible signaling pathway from photosynthesis, through *COPI* and  
312 *TAC1* to regulate branch angles, and that *TAC1* may function as part of a feedback mechanism  
313 by which plants modify branch orientations to optimize light capture and photosynthetic  
314 efficiency.

315

## 316 **ACKNOWLEDGEMENTS**

317

318 We would like to thank the labs of Kerry Franklin, Chentao Lin, Ken-ichiro Shimazaki, Xing  
319 Wang Deng, Jennifer Nemhauser, and In-Cheol Jang for providing seeds of the light signaling  
320 mutants. The work at AFRS was supported by Agriculture and Food Research Initiative  
321 Competitive grant 10891264 from the USDA National Institute of Food and Agriculture and by  
322 the National Science Foundation grant number 1339211.

323

## 324 **AUTHOR CONTRIBUTIONS**

325

326 JMG designed experiments and performed analyses. JMG wrote the manuscript with help from  
327 CD.

## **REFERENCES**

**Ang LH, Deng XW.** 1994. Regulatory Hierarchy of Photomorphogenic Loci: Allele-Specific and Light-Dependent Interaction between the HY5 and COP1 Loci. *THE PLANT CELL ONLINE* **6**, 613–628.

**Casal JJ.** 2012. Shade avoidance. *The Arabidopsis book / American Society of Plant Biologists* **10**, e0157.

**Dardick C, Callahan A, Horn R, Ruiz KB, Zhebentyayeva T, Hollender C, Whitaker M, Abbott A, Scorza R.** 2013. PpeTAC1 promotes the horizontal growth of branches in peach trees and is a member of a functionally conserved gene family found in diverse plants species. *Plant Journal* **75**, 618–630.

**Digby J, Firn RD.** 2002. Light modulation of the gravitropic set-point angle (GSA). *Journal of experimental botany* **53**, 377–381.

**Dong Z, Jiang C, Chen X, et al.** 2013. Maize LAZY1 mediates shoot gravitropism and inflorescence development through regulating auxin transport, auxin signaling, and light response. *Plant physiology* **163**, 1306–22.

**Ge L, Chen R.** 2016. Negative gravitropism in plant roots. *Nature Plants* **2**, 16155.

**Glenn DM, Bassett CB, Tworkoski T, Scorza R, Miller SS.** 2015. Tree architecture of pillar and standard peach affect canopy transpiration and water use efficiency. *Scientia Horticulturae* **187**, 30–34.

**Gray JC, Sullivan J a, Wang J-H, Jerome C a, MacLean D.** 2003. Coordination of plastid and nuclear gene expression. *Philosophical transactions of the Royal Society of London. Series B, Biological sciences* **358**, 135–144; discussion 144–145.

**Guseman JM, Webb K, Srinivasan C, Dardick C.** 2016. DRO1 influences root system architecture in Arabidopsis and Prunus species. , 1093–1105.

**Hollender CA, Dardick C.** 2015. Molecular basis of angiosperm tree architecture. *The New phytologist* **206**, 541–56.

**Hu W, Franklin KA, Sharrock RA, Jones MA, Harmer SL, Lagarias JC.** 2013.

Unanticipated regulatory roles for Arabidopsis phytochromes revealed by null mutant analysis. *Proceedings of the National Academy of Sciences of the United States of America* **110**, 1542–7.

**Jang I-C, Henriques R, Chua N-H.** 2013. Three Transcription Factors, HFR1, LAF1 and HY5, Regulate Largely Independent Signaling Pathways Downstream of Phytochrome A. *Plant and Cell Physiology* **54**, 907–916.

**Kinoshita T, Doi M, Suetsugu N, Kagawa T, Wada M, Shimazaki K.** 2001. phot1 and phot2 mediate blue light regulation of stomatal opening. *Nature* **414**, 656–660.

**Ku L, Wei X, Zhang S, Zhang J, Guo S, Chen Y.** 2011. Cloning and characterization of a putative *tac1* ortholog associated with leaf angle in maize (*zea mays* l.). *PLoS ONE* **6**, 1–7.

**Li H, Zhang L, Hu J, et al.** 2017. Genome-Wide Association Mapping Reveals the Genetic Control Underlying Branch Angle in Rapeseed (*Brassica napus* L.). *Frontiers in Plant Science* **8**, 1054.

**Lilley JLS, Gee CW, Sairanen I, Ljung K, Nemhauser JL.** 2012. An endogenous carbon-sensing pathway triggers increased auxin flux and hypocotyl elongation. *Plant Physiology* **160**, 2261–2270.

**Mockler TC, Guo H, Yang H, Duong H, Lin C.** 1999. Antagonistic actions of Arabidopsis cryptochromes and phytochrome B in the regulation of floral induction. *Development (Cambridge, England)* **126**, 2073–82.

**Osada N, Hiura T.** 2017. How is light interception efficiency related to shoot structure in tall canopy species? *Oecologia* **185**, 29–41.

**Pantazopoulou CK, Bongers FJ, Küpers JJ, Reinen E, Das D, Evers JB, Anten NPR, Pierik R.** 2017. Neighbor detection at the leaf tip adaptively regulates upward leaf movement through spatial auxin dynamics. *Proceedings of the National Academy of Sciences* **114**, 7450–7455.

**Roychoudhry S, Kieffer M, Del Bianco M, Liao C-Y, Weijers D, Kepinski S.** 2017. The developmental and environmental regulation of gravitropic setpoint angle in Arabidopsis and bean. *Scientific Reports* **7**, 42664.

**Taniguchi M, Furutani M, Nishimura T, et al.** 2017. The Arabidopsis LAZY1 Family Plays a Key Role in Gravity Signaling within Statocytes and in Branch Angle Control of Roots and Shoots. *The Plant Cell* **29**, 1984–1999.

**Willemoes JG, Beltrano J, Montalbi R.** 1988. Diagravitropic growth promoted by high sucrose contents in *Paspalum vaginatum*, and its reversion by gibberellic acid. *Canadian Journal of Botany* **66**, 2035–2037.

**Xu X, Chi W, Sun X, et al.** 2016. Convergence of light and chloroplast signals for de-etiolation through ABI4–HY5 and COP1. *Nature Plants* **2**, 16066.

**Yoshihara T, Spalding EP.** 2017. LAZY genes mediate the effects of gravity on auxin gradients and plant architecture. *Plant Physiology*, pp.00942.2017.

**Yoshihara T, Spalding EP, Iino M.** 2013. AtLAZY1 is a signaling component required for gravitropism of the Arabidopsis thaliana inflorescence. *Plant Journal* **74**, 267–279.

**Yu B, Lin Z, Li H, et al.** 2007. TAC1, a major quantitative trait locus controlling tiller angle in rice. *Plant Journal* **52**, 891–898.

## FIGURE LEGENDS

### Figure 1. *TAC1* expression is light dependent.

- A. Promoter analysis of *TAC1* reveals light-related motifs.
- B. Quantitative-RT-PCR shows dramatic reduction in *TAC1* expression in wild-type seedlings grown in continuous dark for 3 days, as compared to continuous light.
- C. Time course qRT-PCR data from plants moved to continuous dark show that complete loss of *TAC1* expression occurs between 24-48 hours in dark.
- D. Time course qRT-PCR data taken from plants moved from 3 days continuous dark to continuous light demonstrate that *TAC1* expression returns to original levels after 24-48 hours in light.
- E. Plants transferred to continuous light maintain *TAC1* expression and do not show a clear circadian rhythm. Error bars represent SD.

### Figure 2. Dark-grown *Arabidopsis* plants exhibit vertically oriented branch growth

- A. Wild-type (Col), *35S::TAC1*, and *tacl* plants grown in continuous light or dark for 72h.
- B. Quantification shows a significant decrease in wild-type and *35S::TAC1* dark-grown lateral branch angle with respect to the upper stem. Error bars represent SD.

### Figure 3. *TAC1* expression is decreased in FR light and *cop1* mutant background

- A. Model of phytochrome, cryptochrome and phototropin light signaling pathways. Adapted from Lau and Deng, 2012.
- B. qRT-PCR expression data in W, R, B, FR light shows *TAC1* is downregulated in FR conditions.
- C. Representative WT and *35S::TAC1* plants grown in W and FR light for 3 days, and quantified branch angles. n=8 plants per treatment
- D. *TAC1* expression in Col and *35S::TAC1* branch apices after 3 days of W or FR light treatment.
- E. *TAC1* expression in Col WT, cryptochrome, and phototropin mutants, grown in continuous white or blue light for 3 days.



F. *TAC1* expression in Ler WT and phytochrome mutants, grown in continuous white or red light for 3 days.

G-H. *TAC1* expression in WT and mutants involved in both red and blue light signaling pathways, *cop1*, *pifQ*, and *hy5;hfr1;laf1*, grown in continuous white, red, or blue light for 3 days. Error bars represent SD.

**Figure 4. Sucrose and photosynthesis inhibitors have differential effects on *TAC1* expression.**

- A. *TAC1* expression in plants grown on media with and without sucrose show no significant difference between treatments.
- B. *TAC1* expression in plants grown in 72h continuous light or dark after transplant to media containing NF, LM, PQ, or a mock control. Expression is decreased when treated with NF, and increased when treated with LM or PQ.
- C. Chlorophyll fluorescence image of plants treated with NF, LM, and PQ.
- D. Quantified photosynthetic efficiency, measured as average Fv/Fm, in plants treated with NF, LM, and PQ.

# FIGURE 1

A

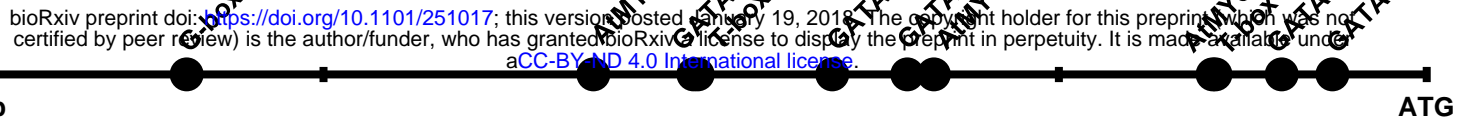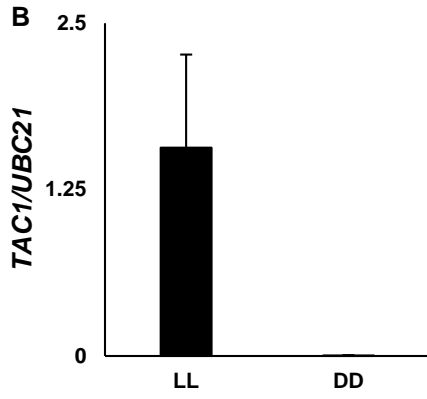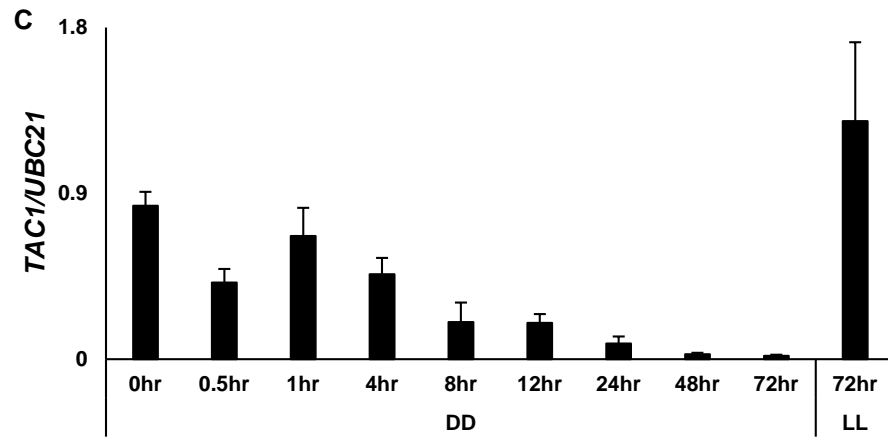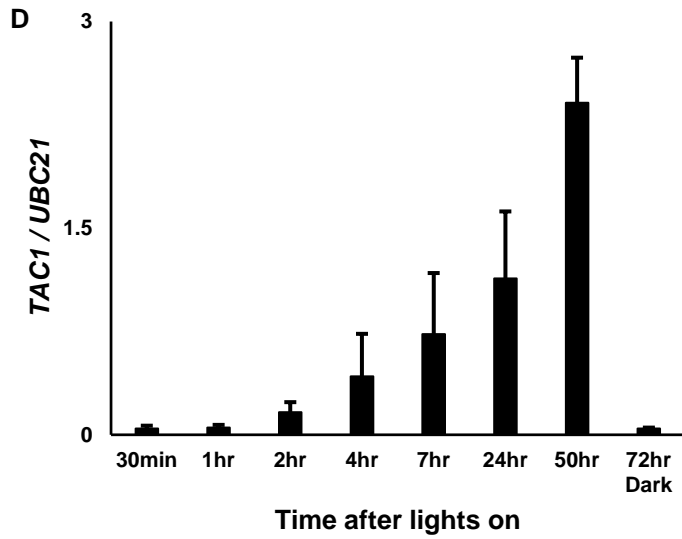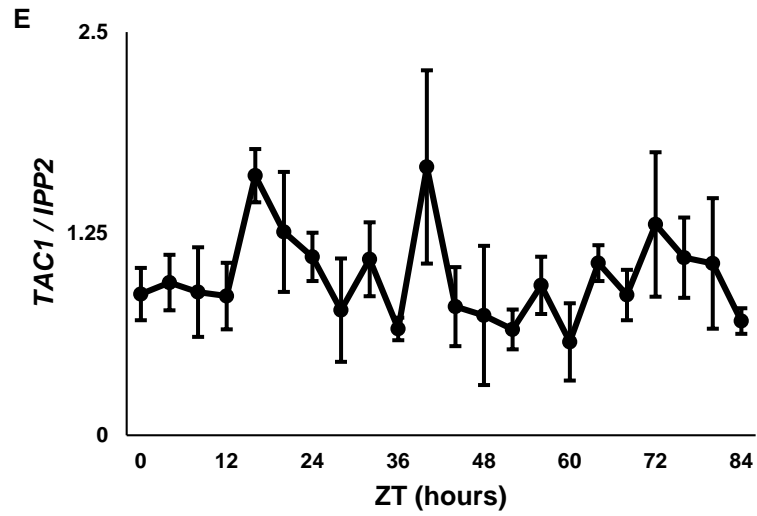

# FIGURE 2

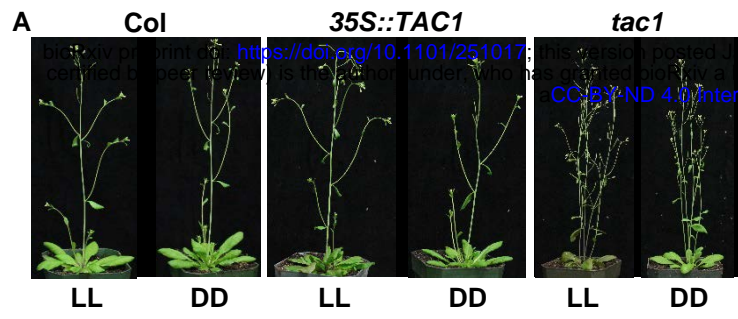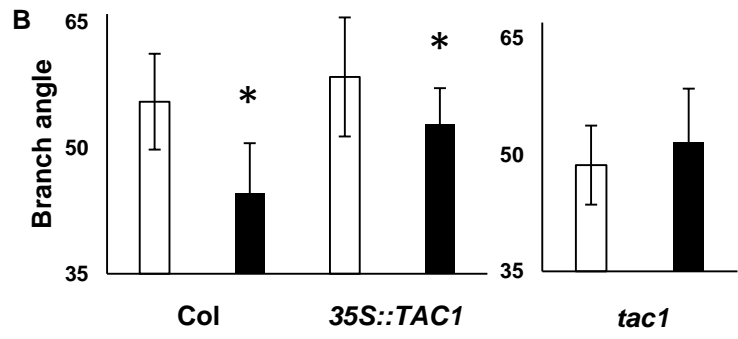

bioRxiv preprint doi: <https://doi.org/10.1101/251017>; this version posted January 19, 2018. The copyright holder for this preprint (which was not certified by peer review) is the author/funder, who has granted bioRxiv a license to display the preprint in perpetuity. It is made available under aCC-BY-ND 4.0 International license.

# FIGURE 3

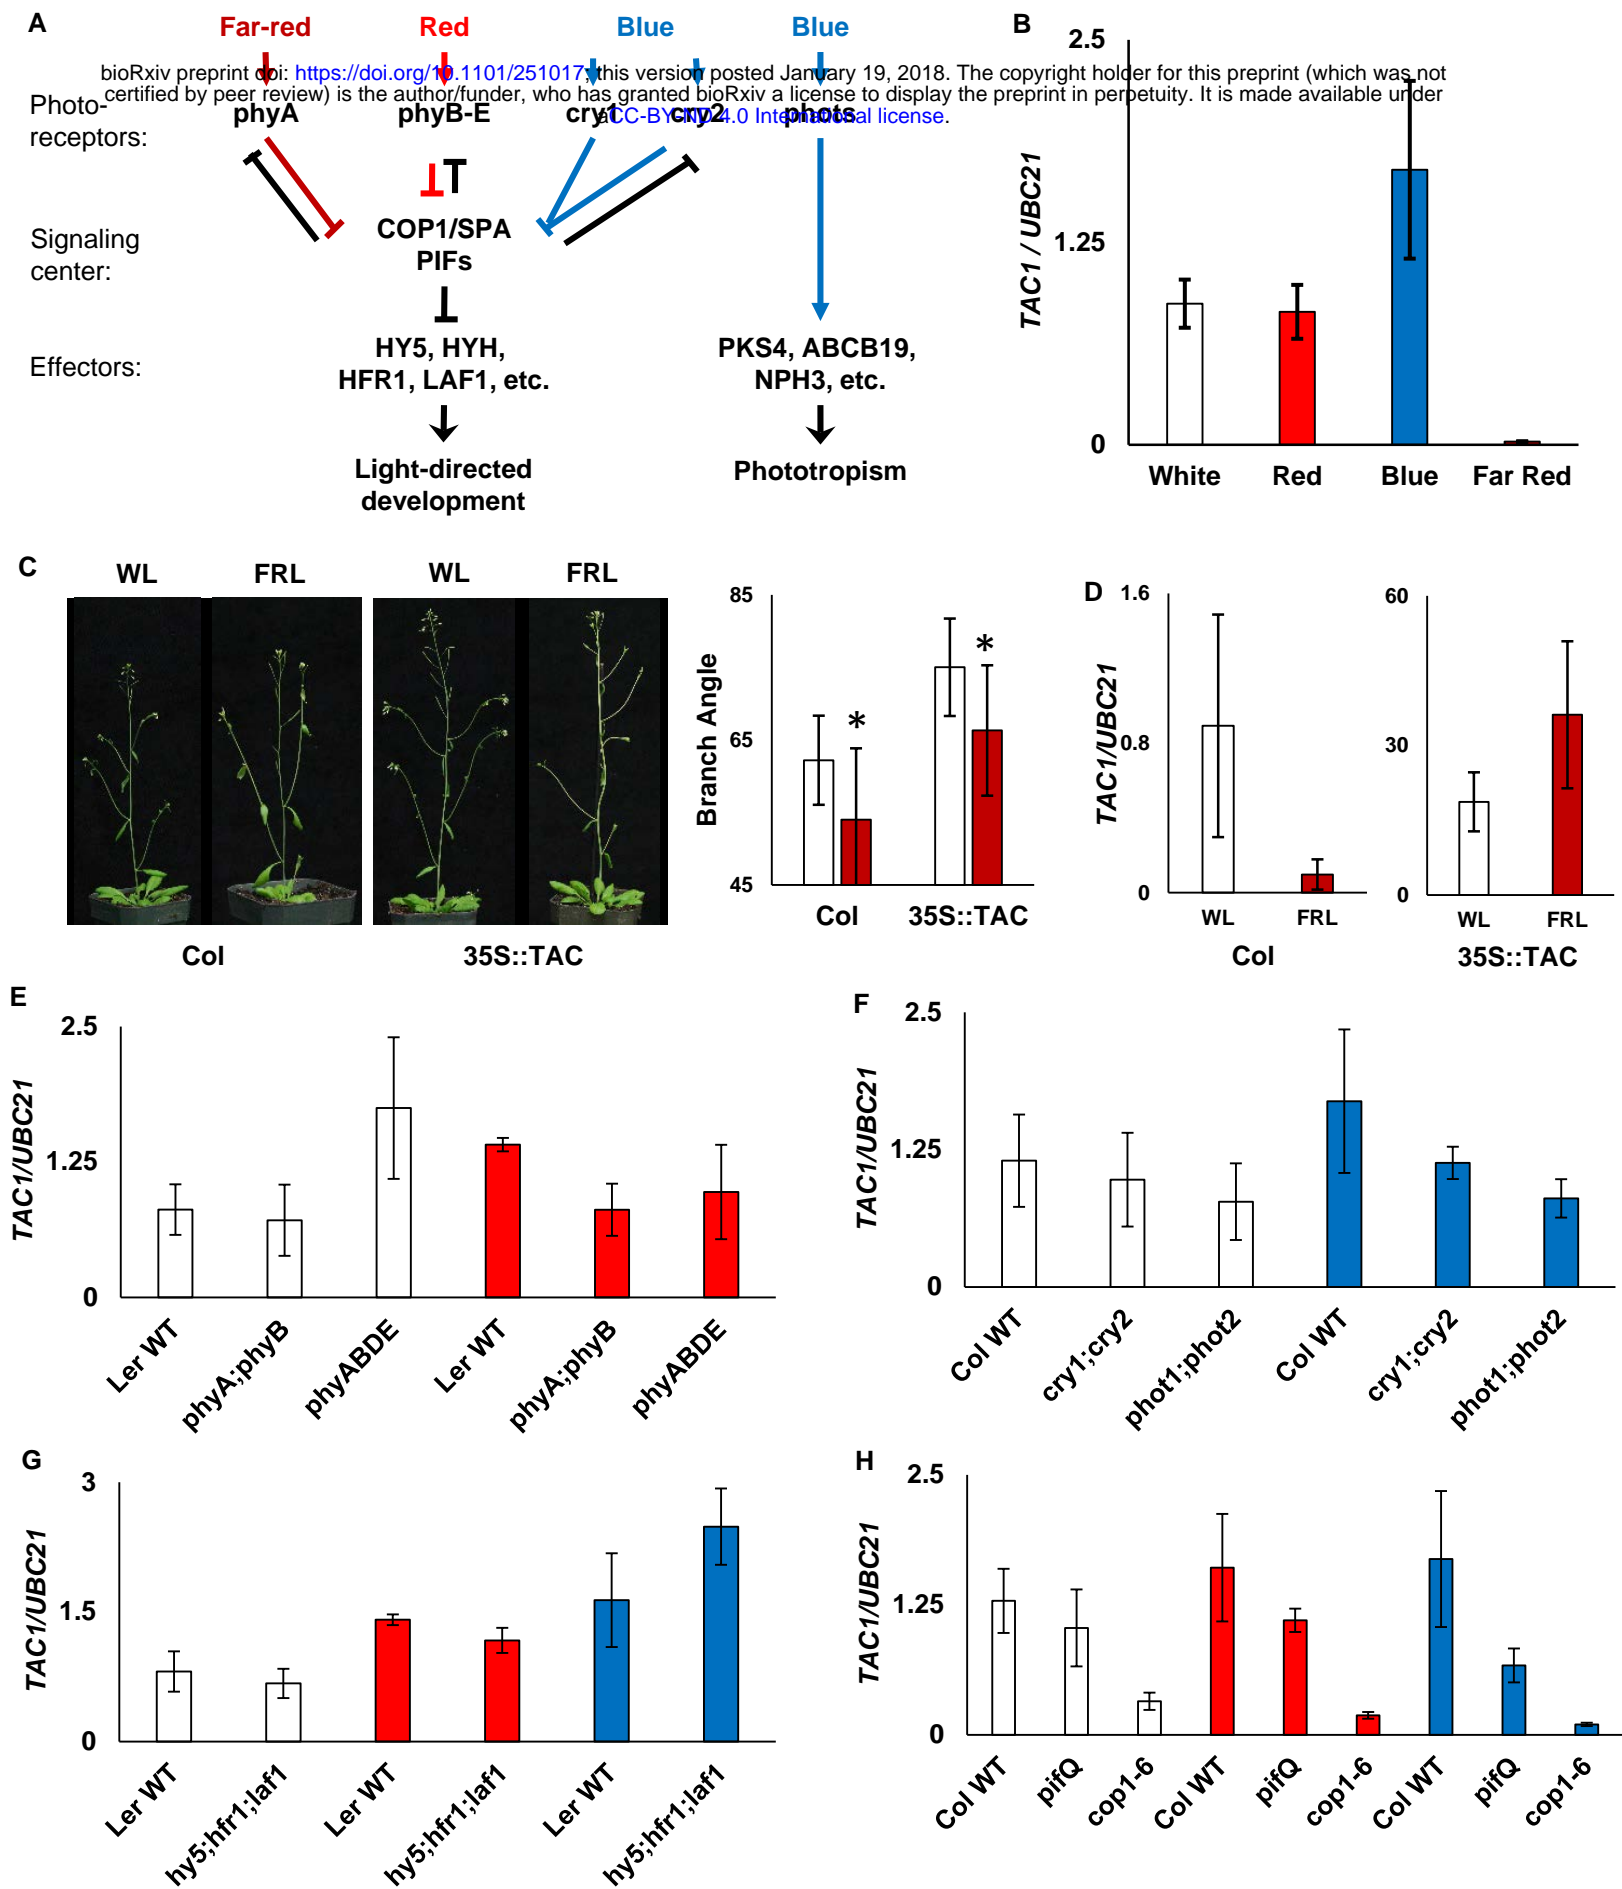

# FIGURE 4

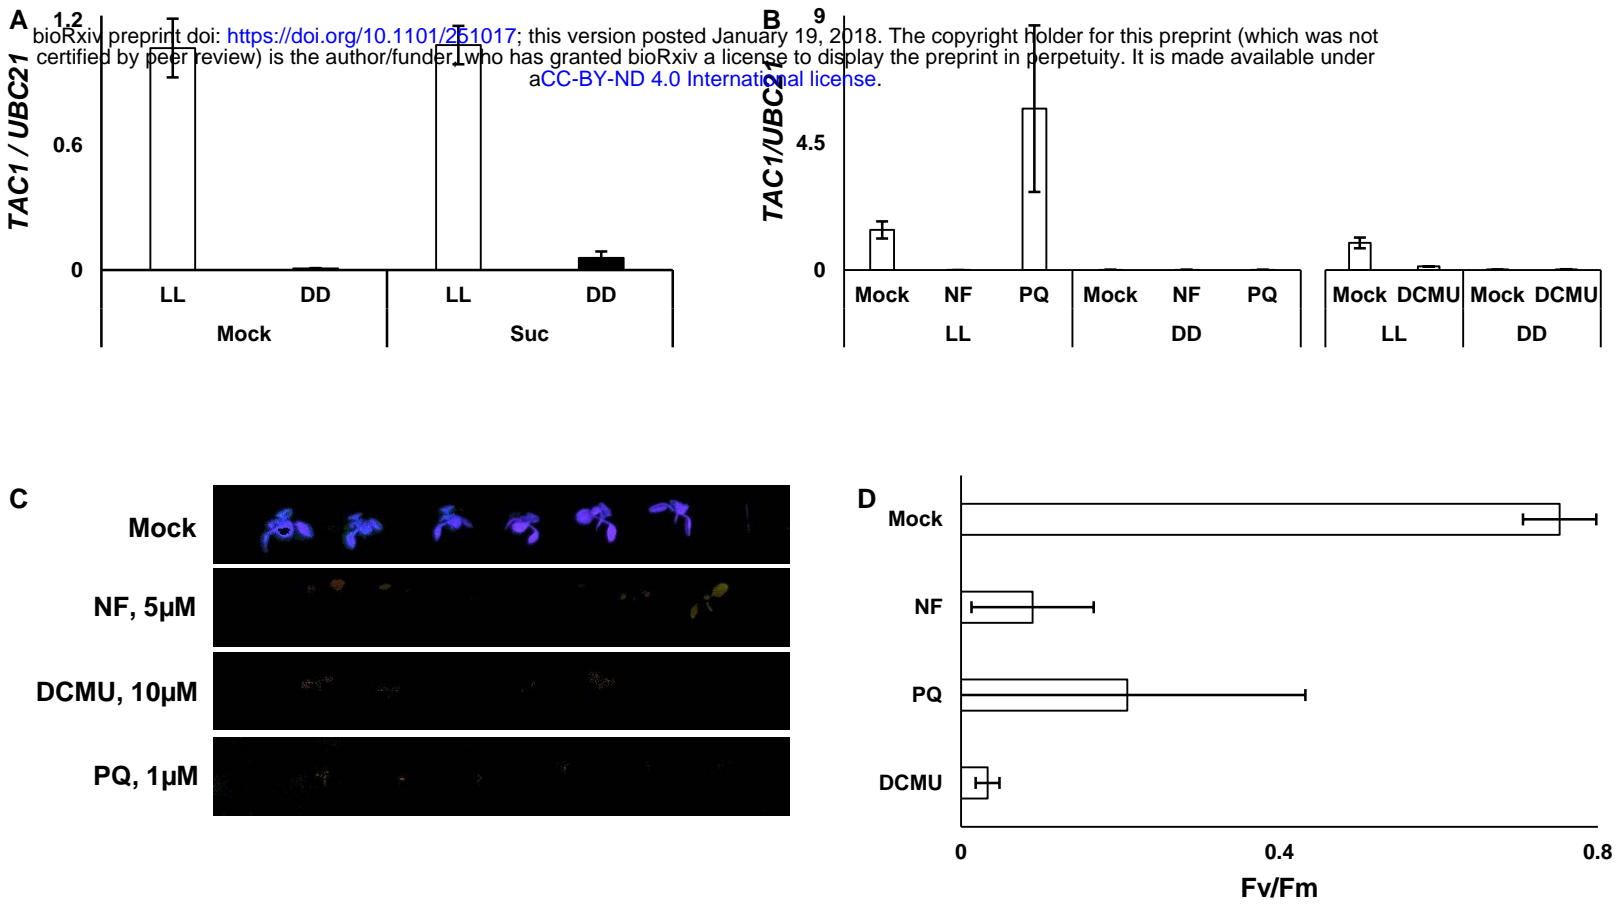

Source: https://www.biorxiv.org/content/10.1101/251017v1.full.pdf
